# Supplementary material for: Green electrochemical sensing platforms: utilizing hydroxyapatite derived from natural fish scales as a novel electrochemical material for the sensitive detection of kidney injury molecule 1 (KIM-1)
Source: Royal Society of Chemistry journal article supplement (doi:10.1039/c4an00957f), 2014-09-05
Supplement: c4an00957f1.pdf [file c4an00957f1.pdf]

## Supporting Information

# Green Electrochemical Sensing Platforms: Utilizing Hydroxyapatite derived from Natural Fish Scales as a Novel Electrochemical Material for the Sensitive Detection of Kidney Injury Molecule 1(KIM-1)

Ying Zhang,<sup>a</sup> Wei Zhang,<sup>b</sup> Qing Zhang,<sup>c</sup> Kaiyang Li<sup>c</sup>, Wei Liu<sup>\*,a</sup>, Yong Liu<sup>\*,c</sup>

and Craig E. Banks<sup>d,\*</sup>

<sup>a</sup> National Engineering Research Center for Nanomedicine, College of Life Science and Technology, Huazhong University of Science and Technology, Wuhan, 430074, P.R. China

<sup>b</sup> 712th Research Institute, China Shipbuilding Industry Corporation, Wuhan, 430064, P.R. China

<sup>c</sup> State Key laboratory of Powder Metallurgy, Central South University, Changsha, 410083, P.R. China

<sup>d</sup> Faculty of Science and Engineering, School of Science and the Environment, Division of Chemistry and Environmental Science, Manchester Metropolitan University, Chester Street, Manchester M1 5GD, Lancs, UK.

## Experimental details

### *Extraction of hydroxyapatite (HAp) powders from fish scales by heat treatment:*

Fish scales were collected/extracted from fresh *Black Carp* (a common freshwater fish) and were washed with water several times in order to clean the scales. These were then air-dried at 50 °C over-night and calcined by a two-step procedure: 400 °C for 2 hours to remove organics and then 700~1100 °C for 4 hours to obtain relatively pure HAp powders.

The phases of the extracting products were identified by powder X-Ray Diffraction meter (XRD; D/ruax 2550PC) using CuK $\alpha$  radiation ( $\lambda=1.5418\text{\AA}$ ). The diffractometer was operated at 40 kV and 100 mA at a  $2\theta$  range of 10-80° with a step size of 0.02°. The microstructures of these samples were observed by Field Emission Scanning Electron Microscope (FESEM; NOVA NANOSEM 230).

### ***Electrochemical determination of KIM-1:***

Commercial KIM-1 (also known as Recombinant Human TIM1/HAVCR, a DNA sequence encoding the mature form of human KIM-1 extracellular domain AAC39862.1 (Ser 21-Gly 290) with a C-terminal polyhistidine tag was expressed and purified) was purchased from Sino Biological Inc. KIM-1 is a 100 kDa, type I transmembrane glycoprotein member of the TIM family of immunoglobulin superfamily molecules. This gene family is involved in the regulation of Th1 and Th2 cell mediated immunity. Human KIM-1 is obtained commercially and is reported to be synthesized as a 359 amino acid (aa) precursor that contains a 20 aa signal sequence, a 270 aa extracellular domain (ECD), a 21 aa transmembrane segment and a 48 aa cytoplasmic domain. The suppliers note that ECD contains one V-type Ig like domain and a mucin region characterized by multiple PTTTTL motifs. The mucin region undergoes extensive O-linked glycosylation. The KIM-1 stock solution (50 µg/ml) was prepared with sterile water and kept at -20 °C~ -70 °C. Concentration of this stock solution was determined via UV-Vis.

The detection of KIM-1 by the proposed modified carbon paste electrode was carried out by linear sweep voltammetry (LSV) and cyclic voltammetry (CV) over the potential range of -0.2 to 0.8 V (vs. SCE), by using an Electrochemical Working Station (CHI-660d, China) under ambient conditions. The 0.2 M phosphate buffer solution (PBS) was used as supporting electrolyte and purged with pure nitrogen for 30 minutes to remove the dissolved oxygen. A conventional three-electrode system consisting of the CMCPE working, SCE reference and platinum wire counter electrodes in a 10 mL glass sample cell were utilized for the determination. Human urine was collected from one of the authors and used on the same day.

**Table 1.**  $2\theta$  and interplanar spacing ( $d$ ) values for (211), (300), (112) and (002) planes (corresponding to the strongest four diffraction peaks) in each calcined sample. The lattice constants for them were obtained by cell refinement <sup>a</sup>

| T(°C) | $2\theta_{211}$ | $2\theta_{300}$ | $2\theta_{112}$ | $2\theta_{002}$ | $d_{211}$ | $d_{300}$ | $d_{112}$ | $d_{002}$ | XS <sup>b</sup> | a      | c      | v      |
|-------|-----------------|-----------------|-----------------|-----------------|-----------|-----------|-----------|-----------|-----------------|--------|--------|--------|
| 700   | 31.725          | 32.852          | 32.150          | 25.837          | 0.2818    | 0.2724    | 0.2782    | 0.3445    | 39.9            | 0.9431 | 0.6890 | 0.5308 |
| 900   | 31.734          | 32.877          | 32.149          | 25.855          | 0.2817    | 0.2722    | 0.2782    | 0.3443    | 74.9            | 0.9430 | 0.6882 | 0.5300 |
| 1100  | 31.740          | 32.890          | 32.147          | 25.850          | 0.2816    | 0.7209    | 0.2871    | 0.3444    | 51.4            | 0.9427 | 0.6884 | 0.5298 |

<sup>a</sup> These data were collected by Jade 5.0 software. <sup>b</sup> Mean crystal size (XS) was evaluated by Scherrer equation.
